# Supplementary material for: A new topology of hexanuclear [MnIII4LnIII2] clusters: syntheses, structures, and magnetic properties
Source: Royal Society of Chemistry journal article supplement (doi:10.1039/c5ra25526k), 2016-01-01
Supplement: c5ra25526k1.pdf [file c5ra25526k1.pdf]

## Supporting Information

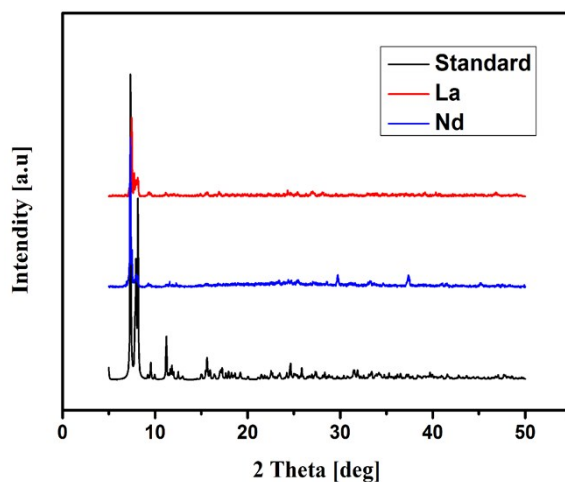

**Figure S1.** The simulated XRD pattern and the experimental patterns for complexes **1** and **2**.

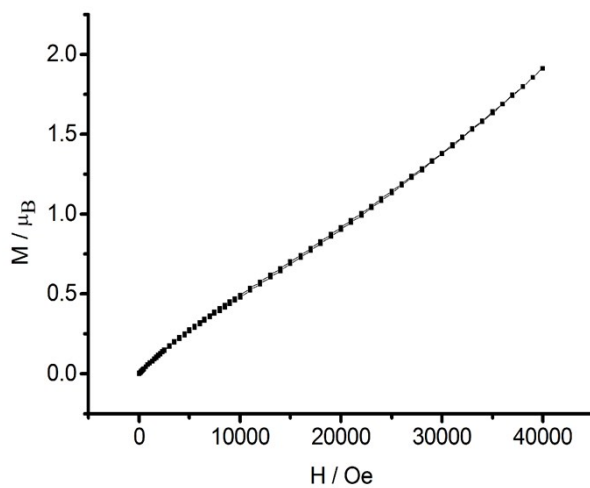

**Figure S2.**  $M$  versus  $H$  plot at 2 K for compound **1**.

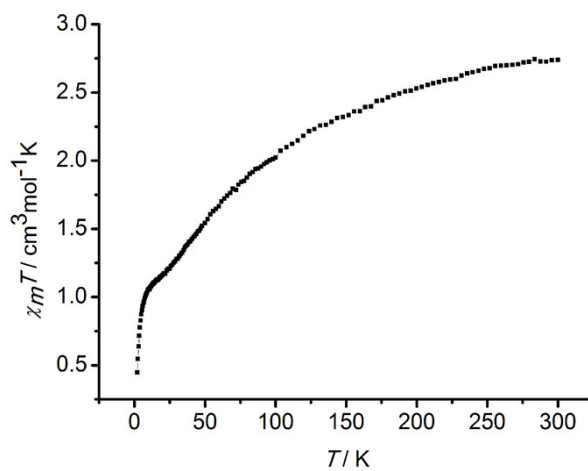

**Figure S3.** The 'subtracted'  $\chi_m T$  versus  $T$  plots at 0.1 T for compound **2**.

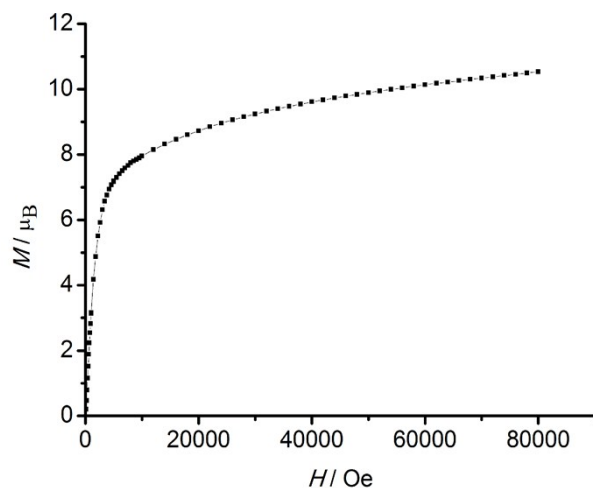

**Figure S4.**  $M$  versus  $H$  plot at 2 K for compound **2**.

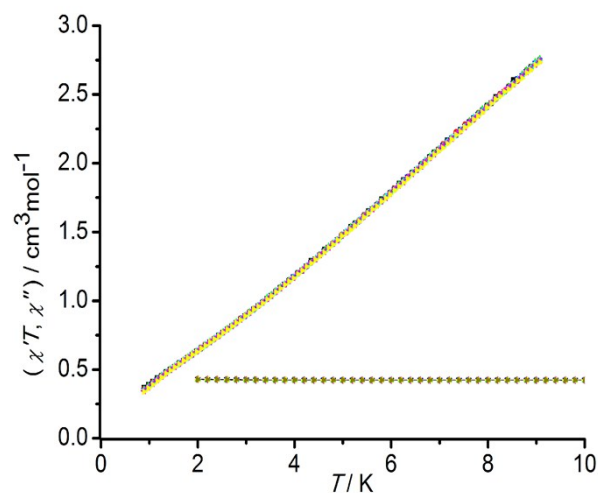

**Figure S5.** Temperature dependences of in-phase  $\chi'T$  ( top) and out-of-phase  $\chi''$  (bottom) ac susceptibilities of **1** at 511 Hz—5111 Hz in zero dc field and 3.0 G field oscillating.

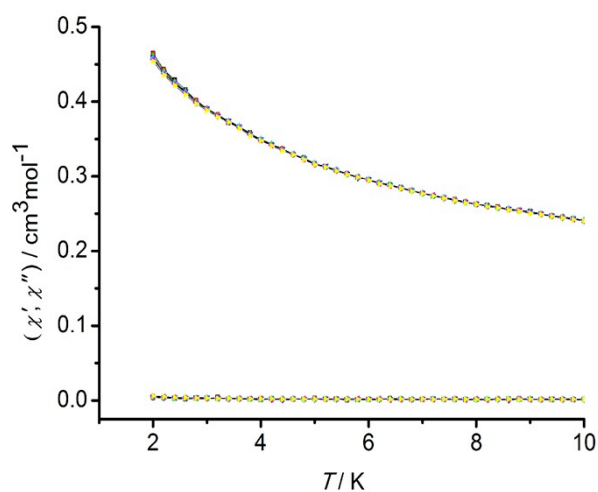

**Figure S6.** Temperature dependences of in-phase  $\chi'$  ( top) and out-of-phase  $\chi''$  (bottom) ac susceptibilities of **2** at 511 Hz—5111 Hz in zero dc field and 3.0 G field oscillating.
